# Supplementary material for: Fast calcium transients in dendritic spines driven by extreme statistics
Source: PubMed Central journal article supplement (PMC6548358; doi:10.1371/journal.pbio.2006202), 2019-06-04

**A**Transmission of  $\text{Ca}^{2+}$  from spine (100%) to dendrite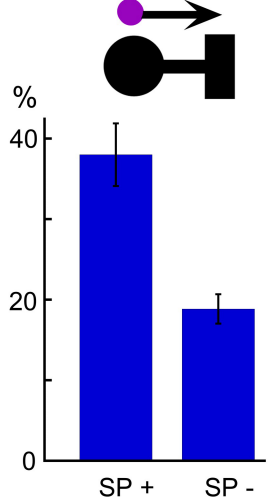**B**Transmission of  $\text{Ca}^{2+}$  from dendrite (100%) to spine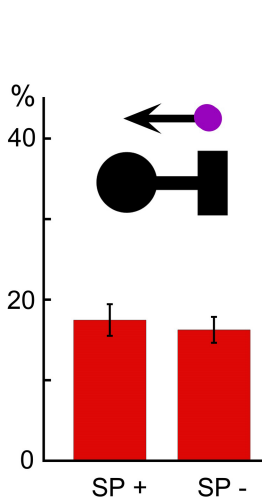**C**

Transmission of fluorescein from spine to dendrite

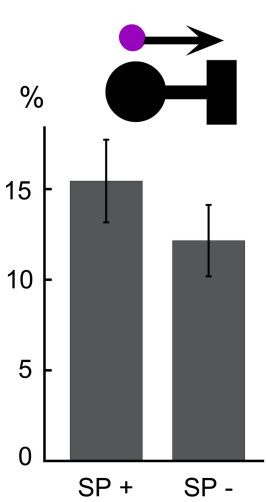

Supplement: pbio.2006202.s005.pdf [file pbio.2006202.s005.pdf]
