# Supplementary material for: Fast calcium transients in dendritic spines driven by extreme statistics
Source: PubMed Central journal article supplement (PMC6548358; doi:10.1371/journal.pbio.2006202), 2019-06-04

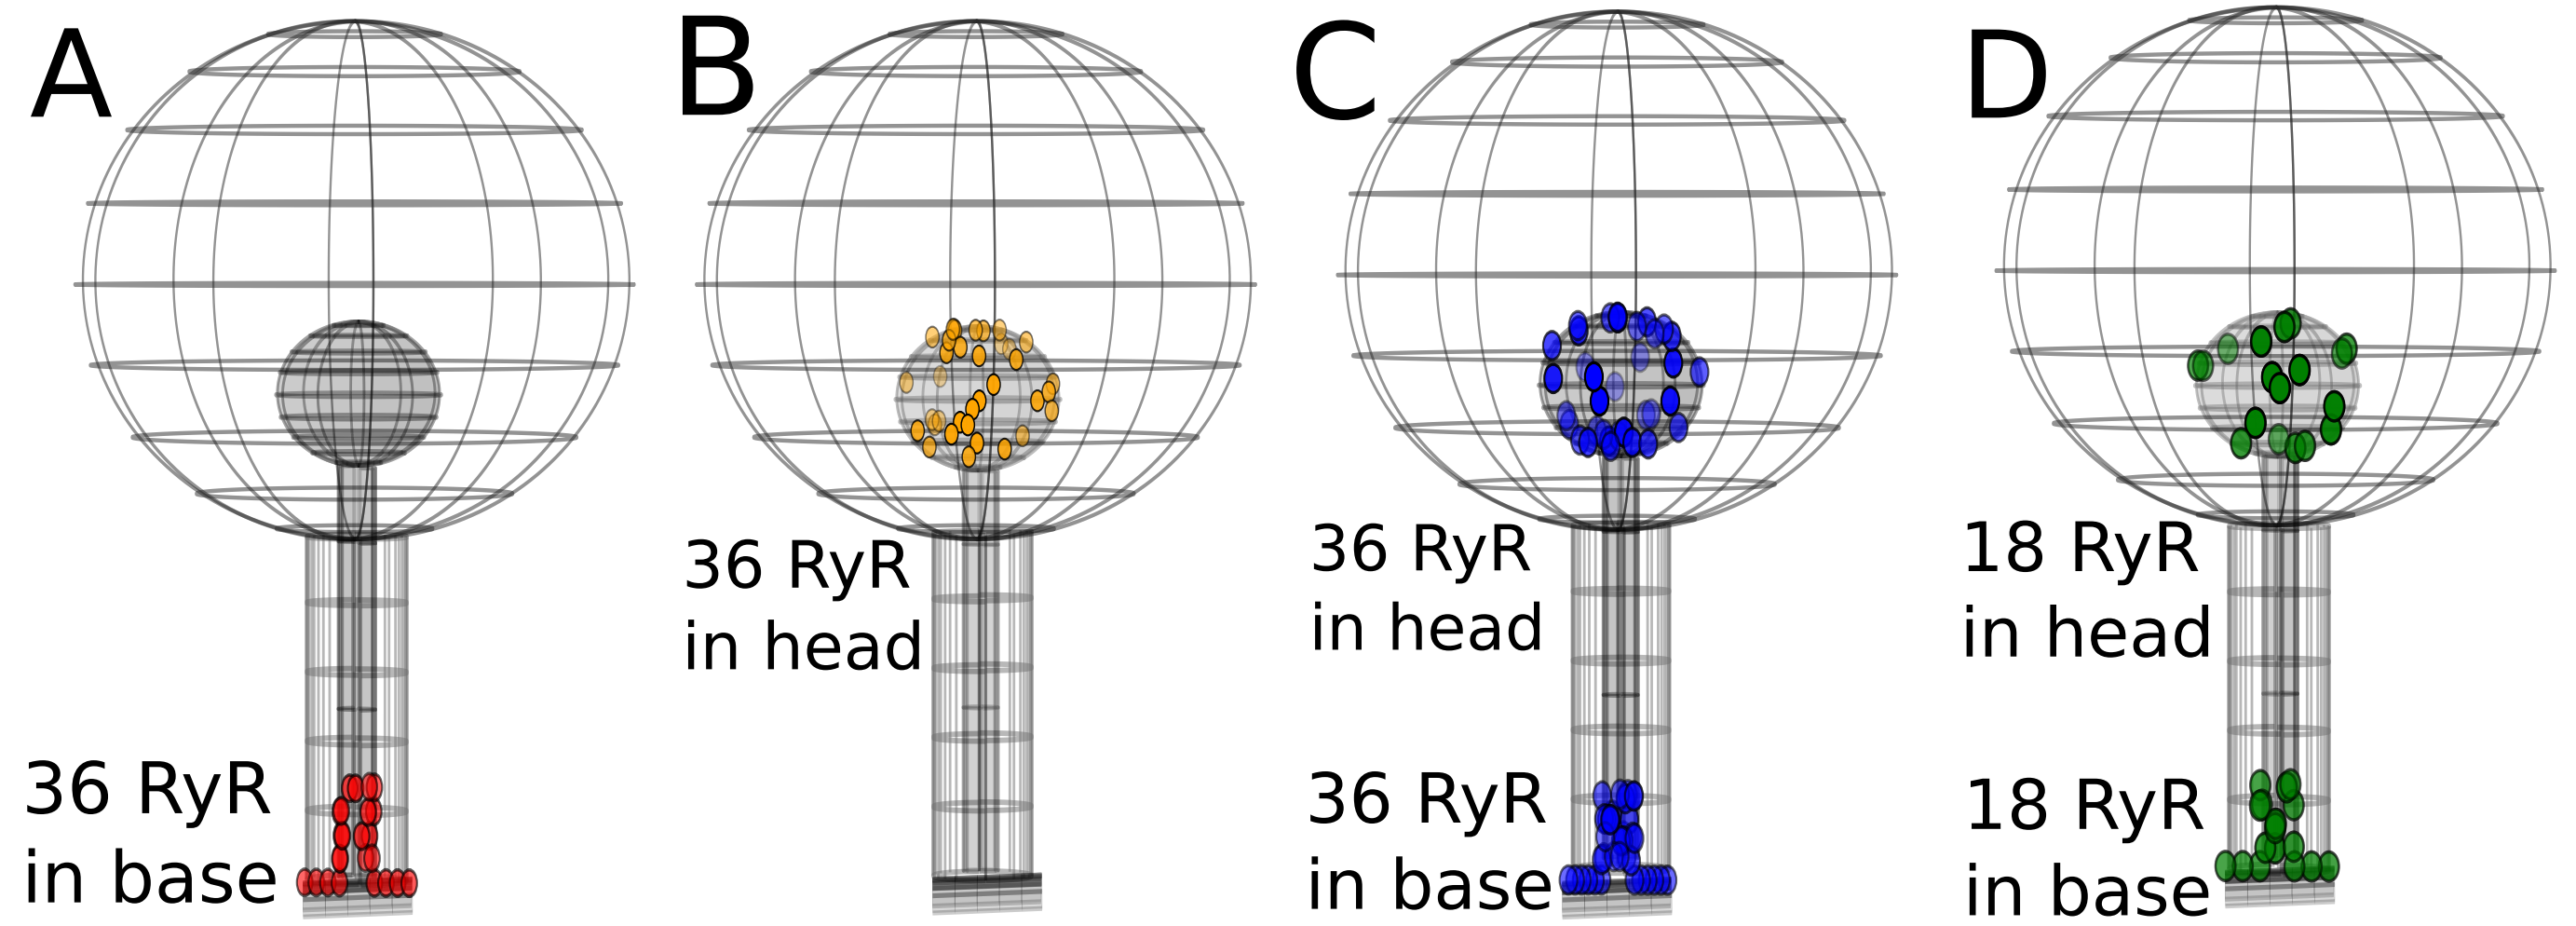

# initial Calcium = 50

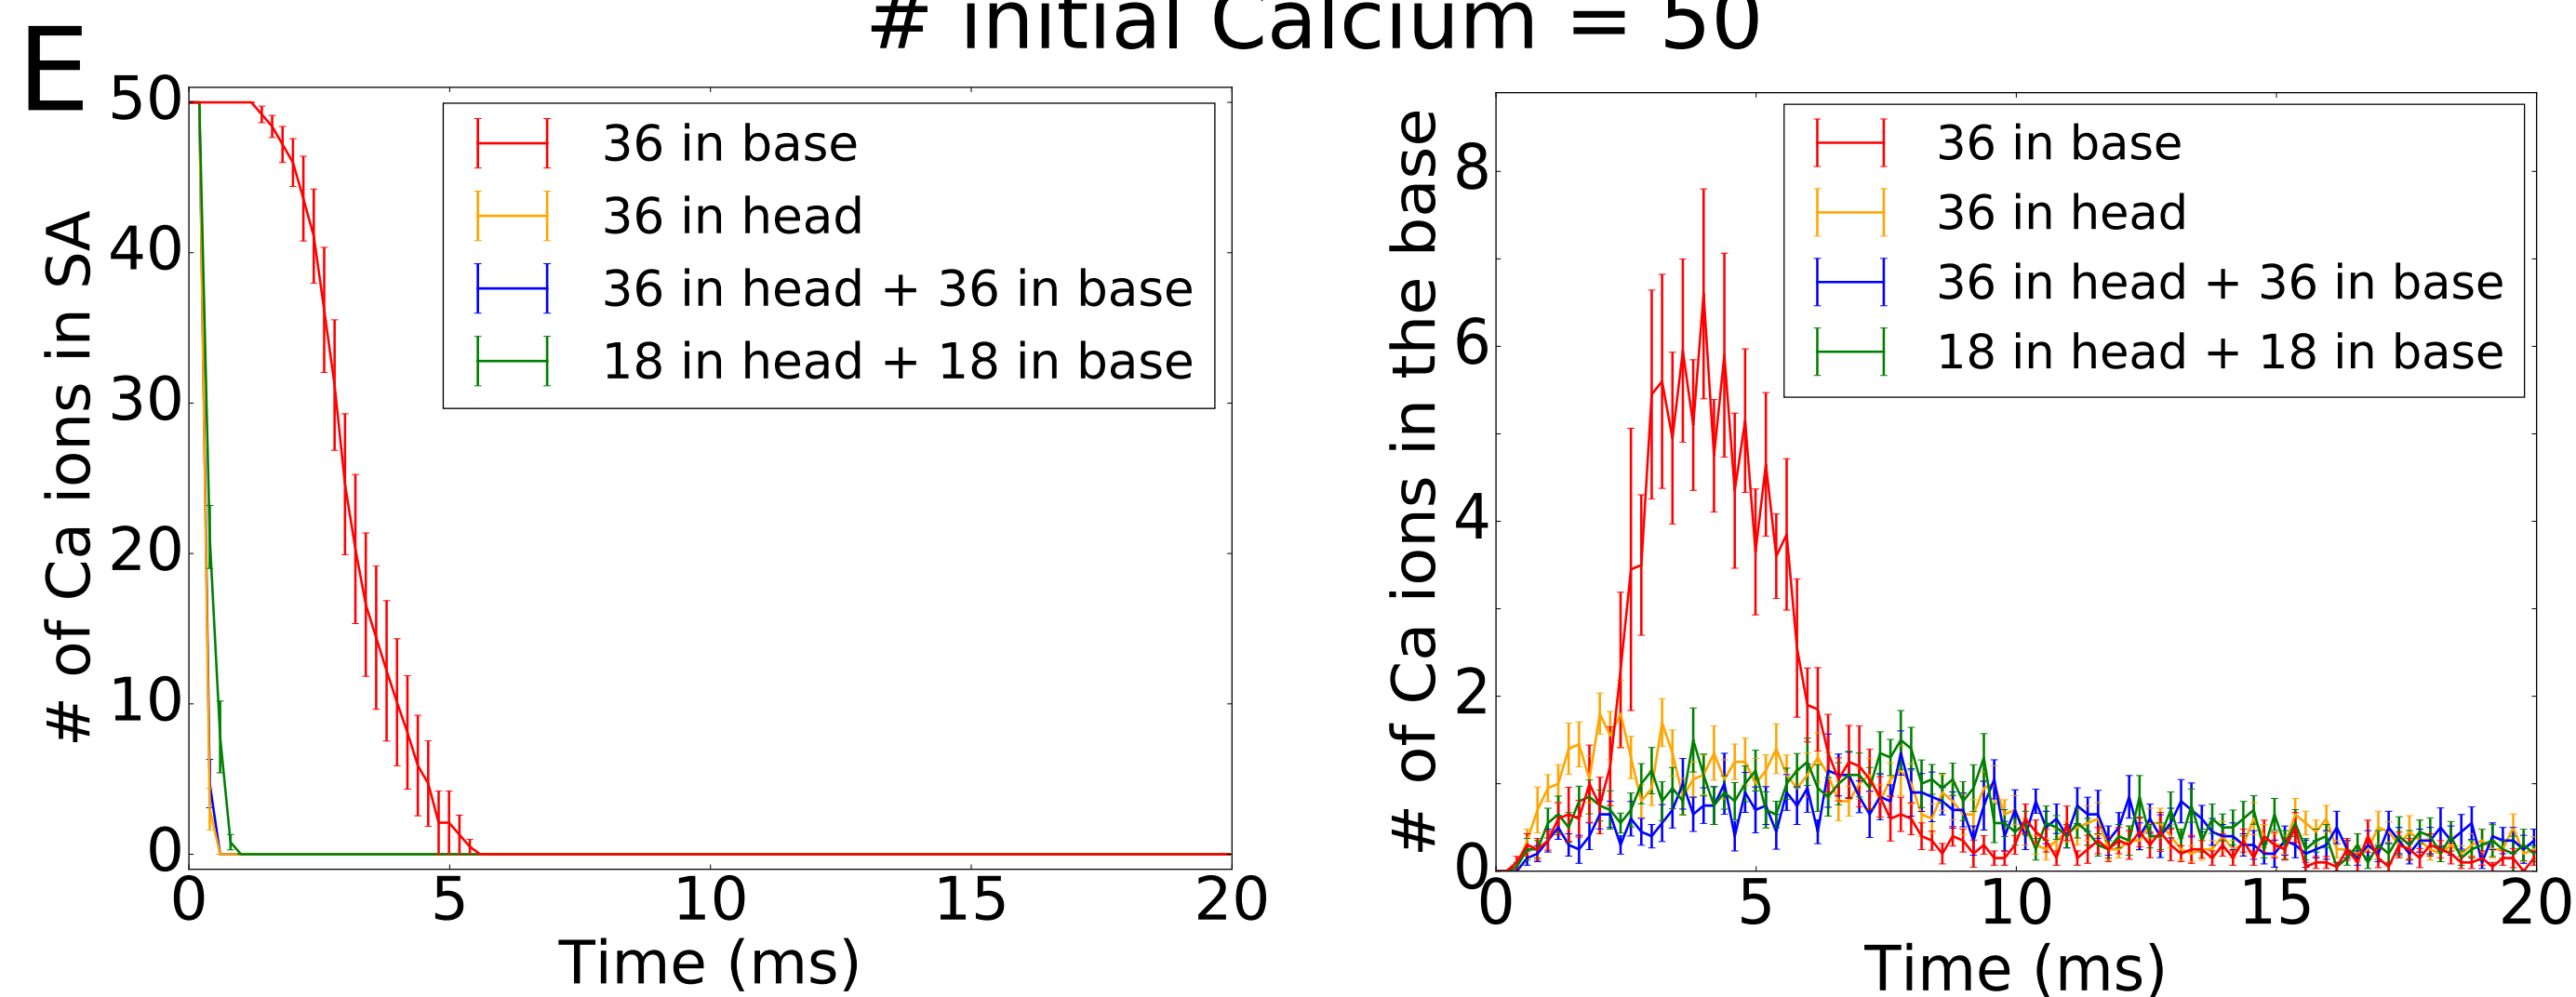

# initial Calcium = 150

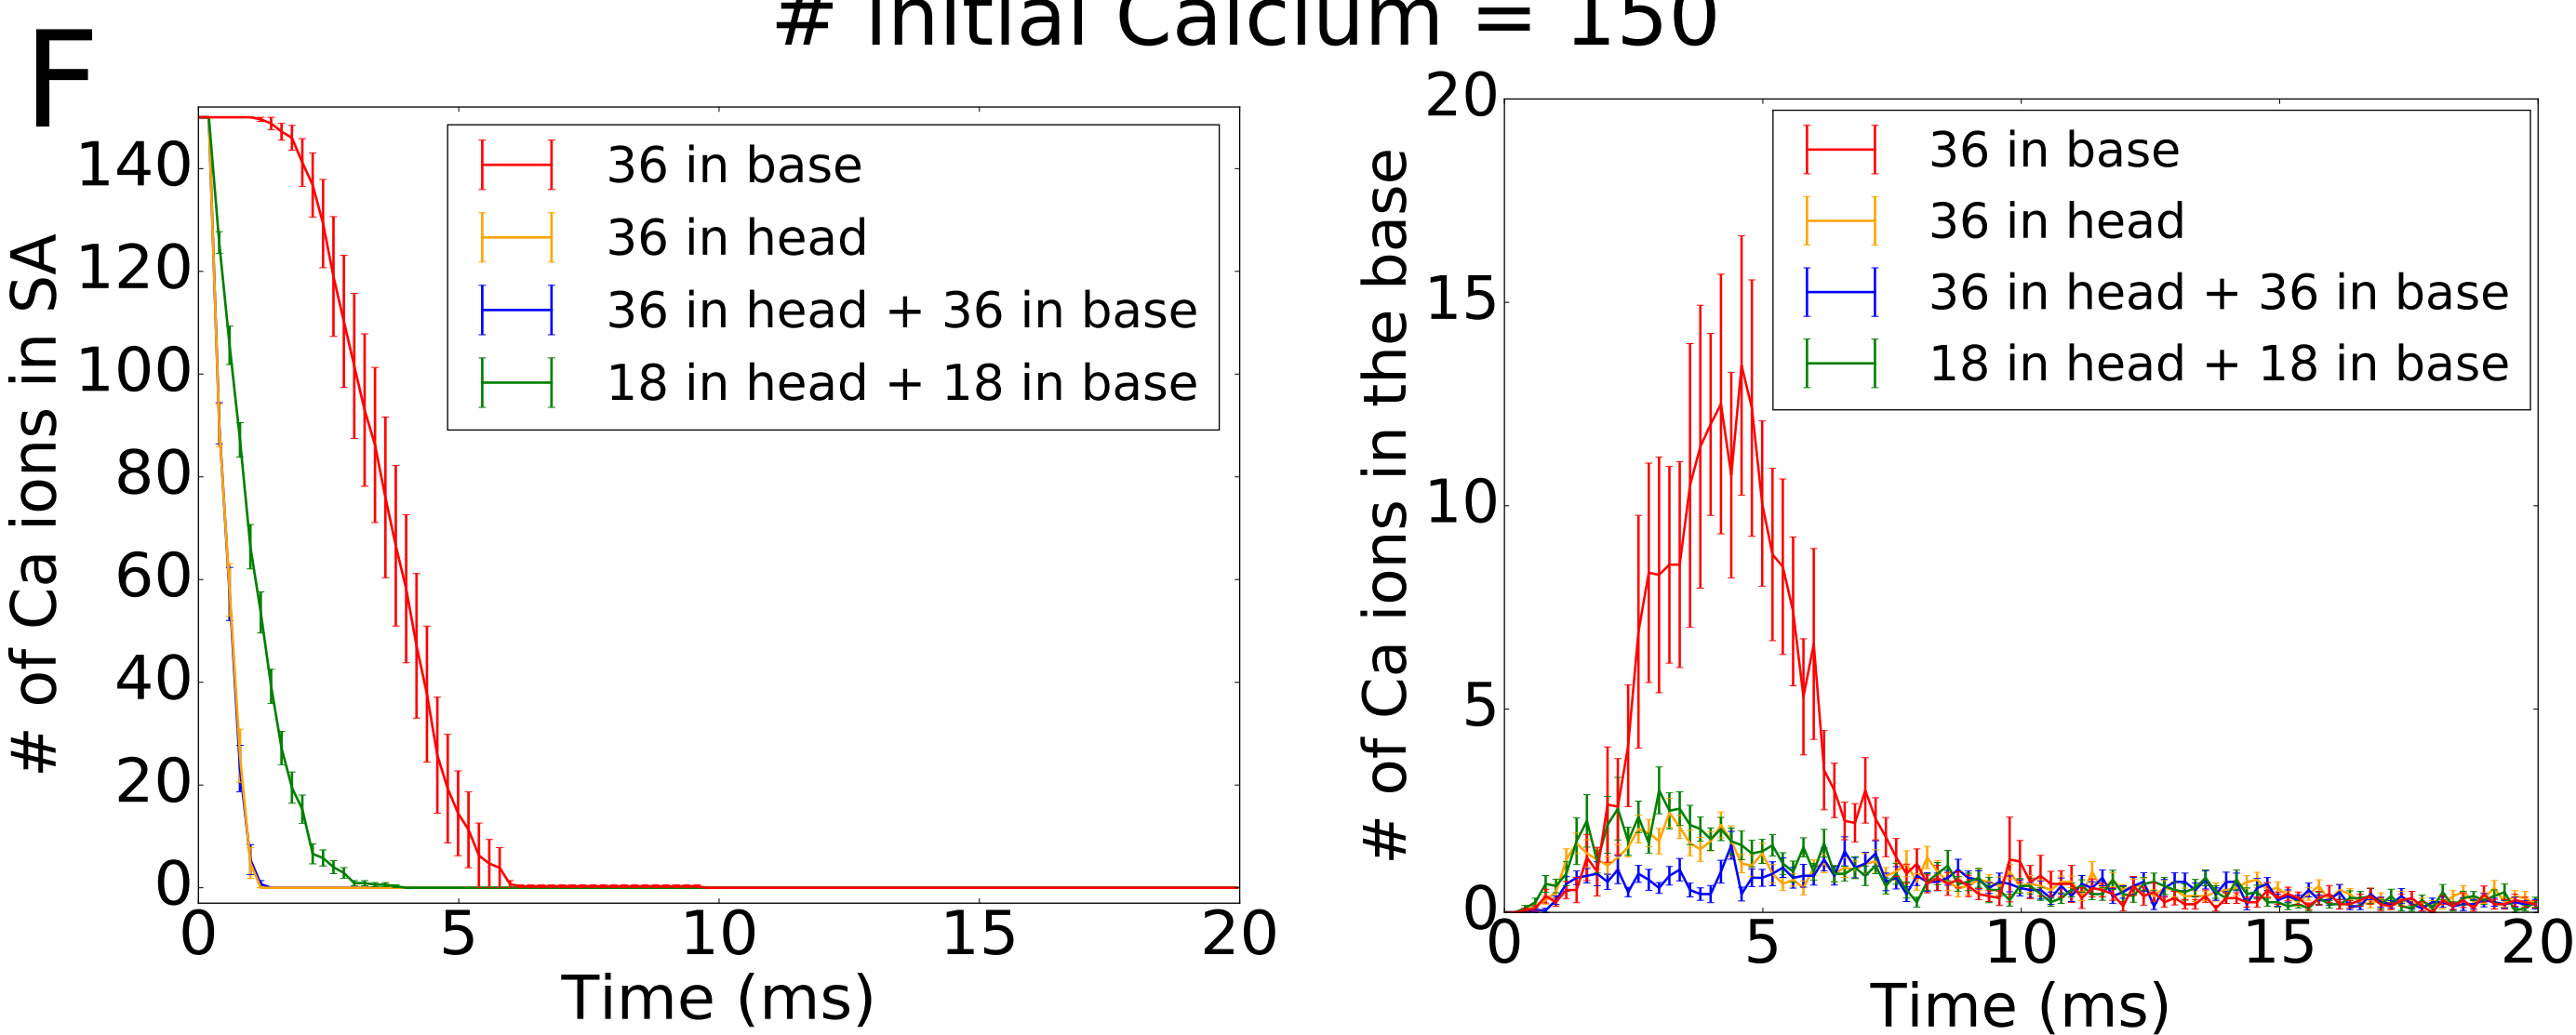

# initial Calcium = 500

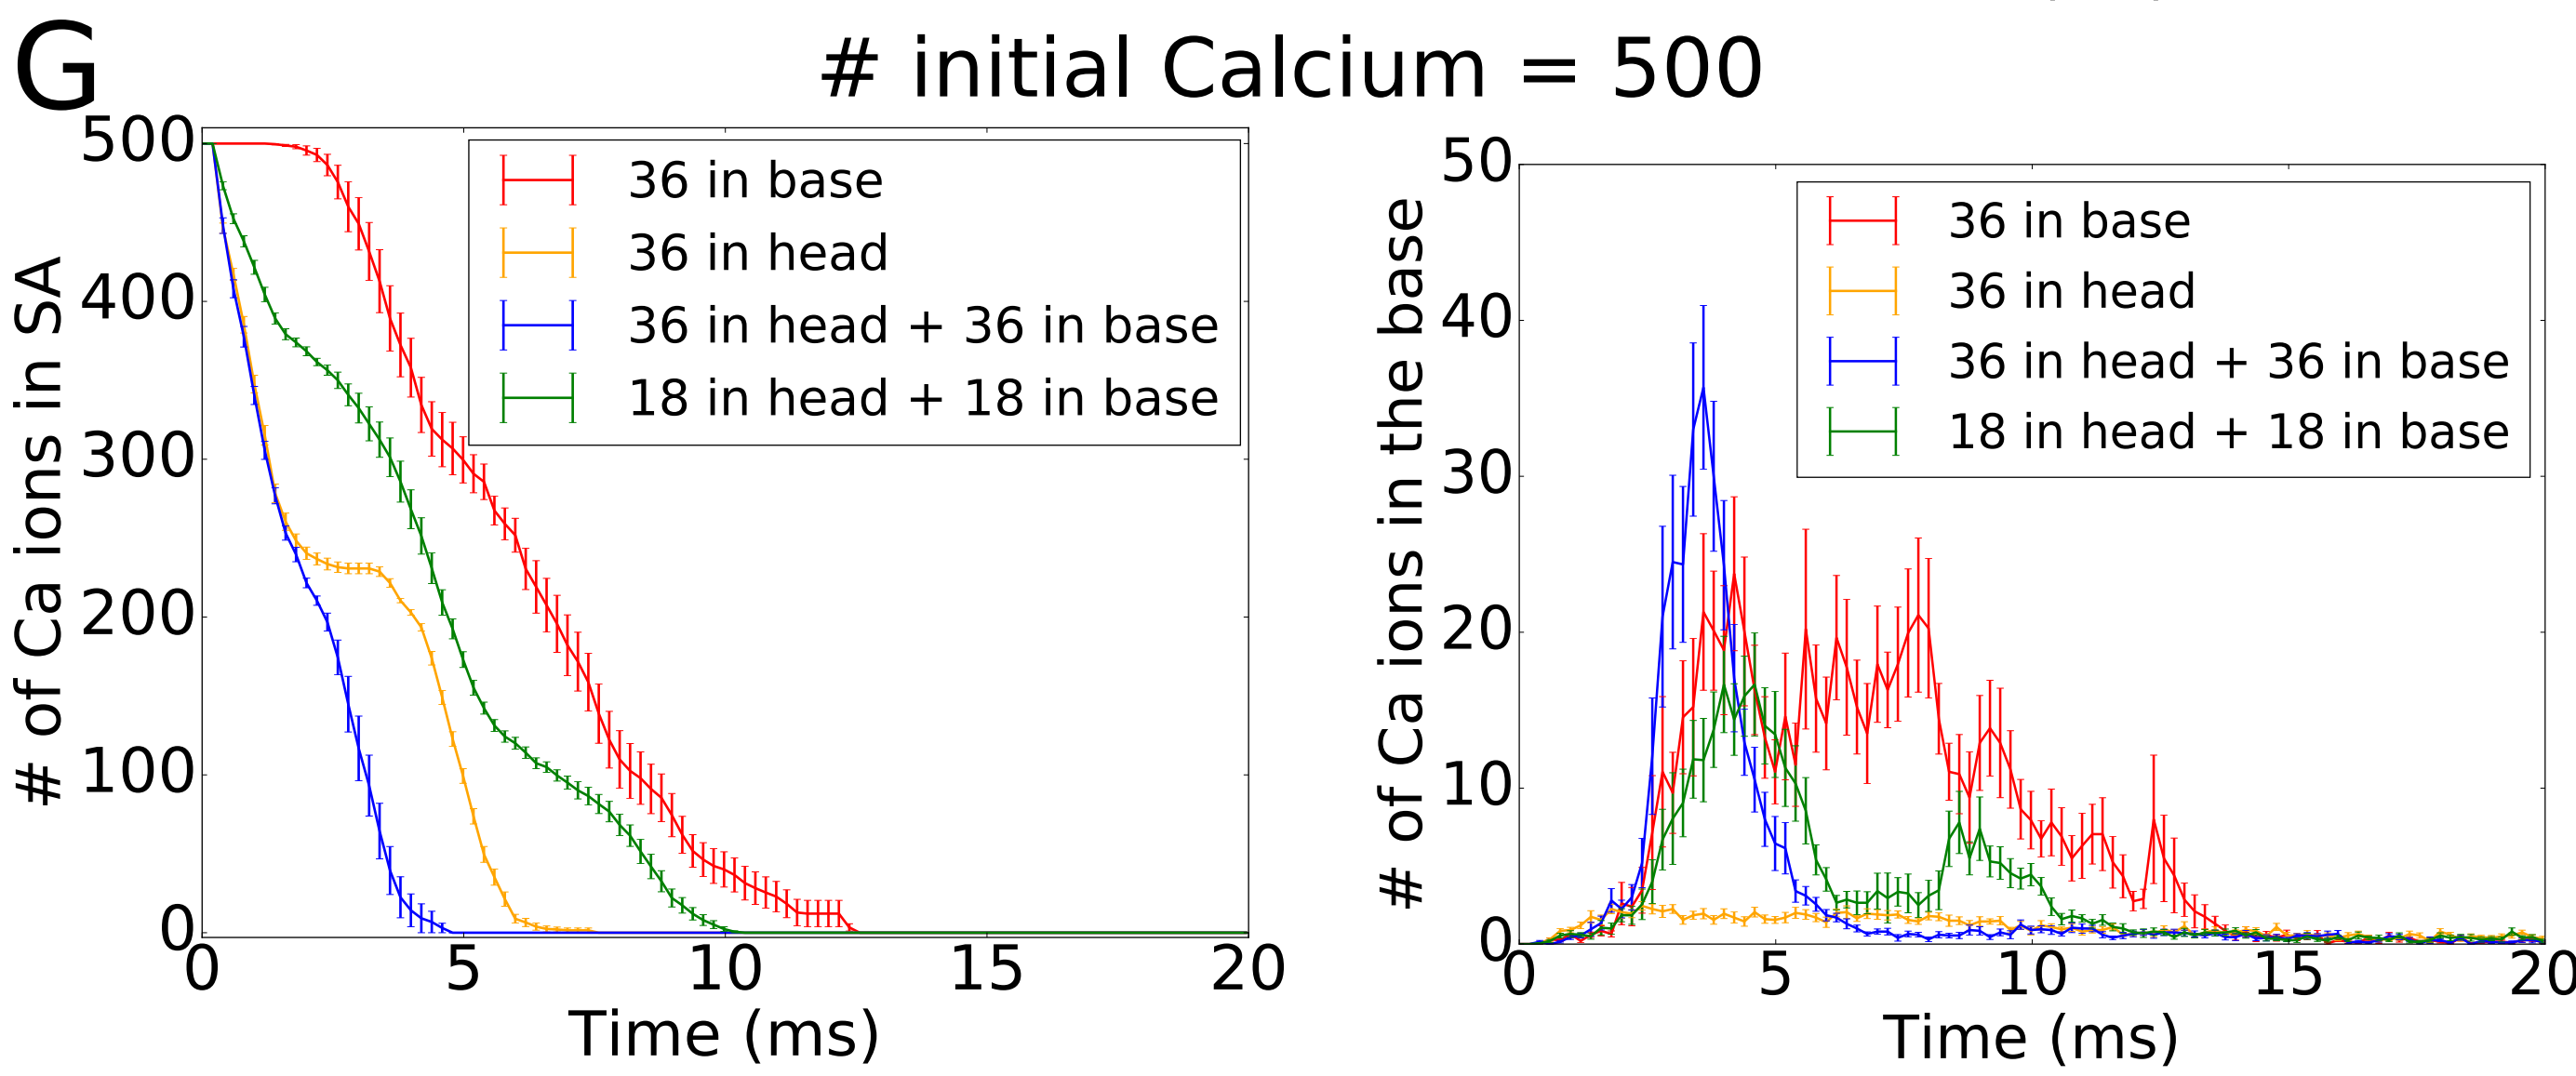

Supplement: pbio.2006202.s007.pdf [file pbio.2006202.s007.pdf]
