# Supplementary material for: Fast calcium transients in dendritic spines driven by extreme statistics
Source: PubMed Central journal article supplement (PMC6548358; doi:10.1371/journal.pbio.2006202), 2019-06-04

# release:  $n_{Ca}=8$

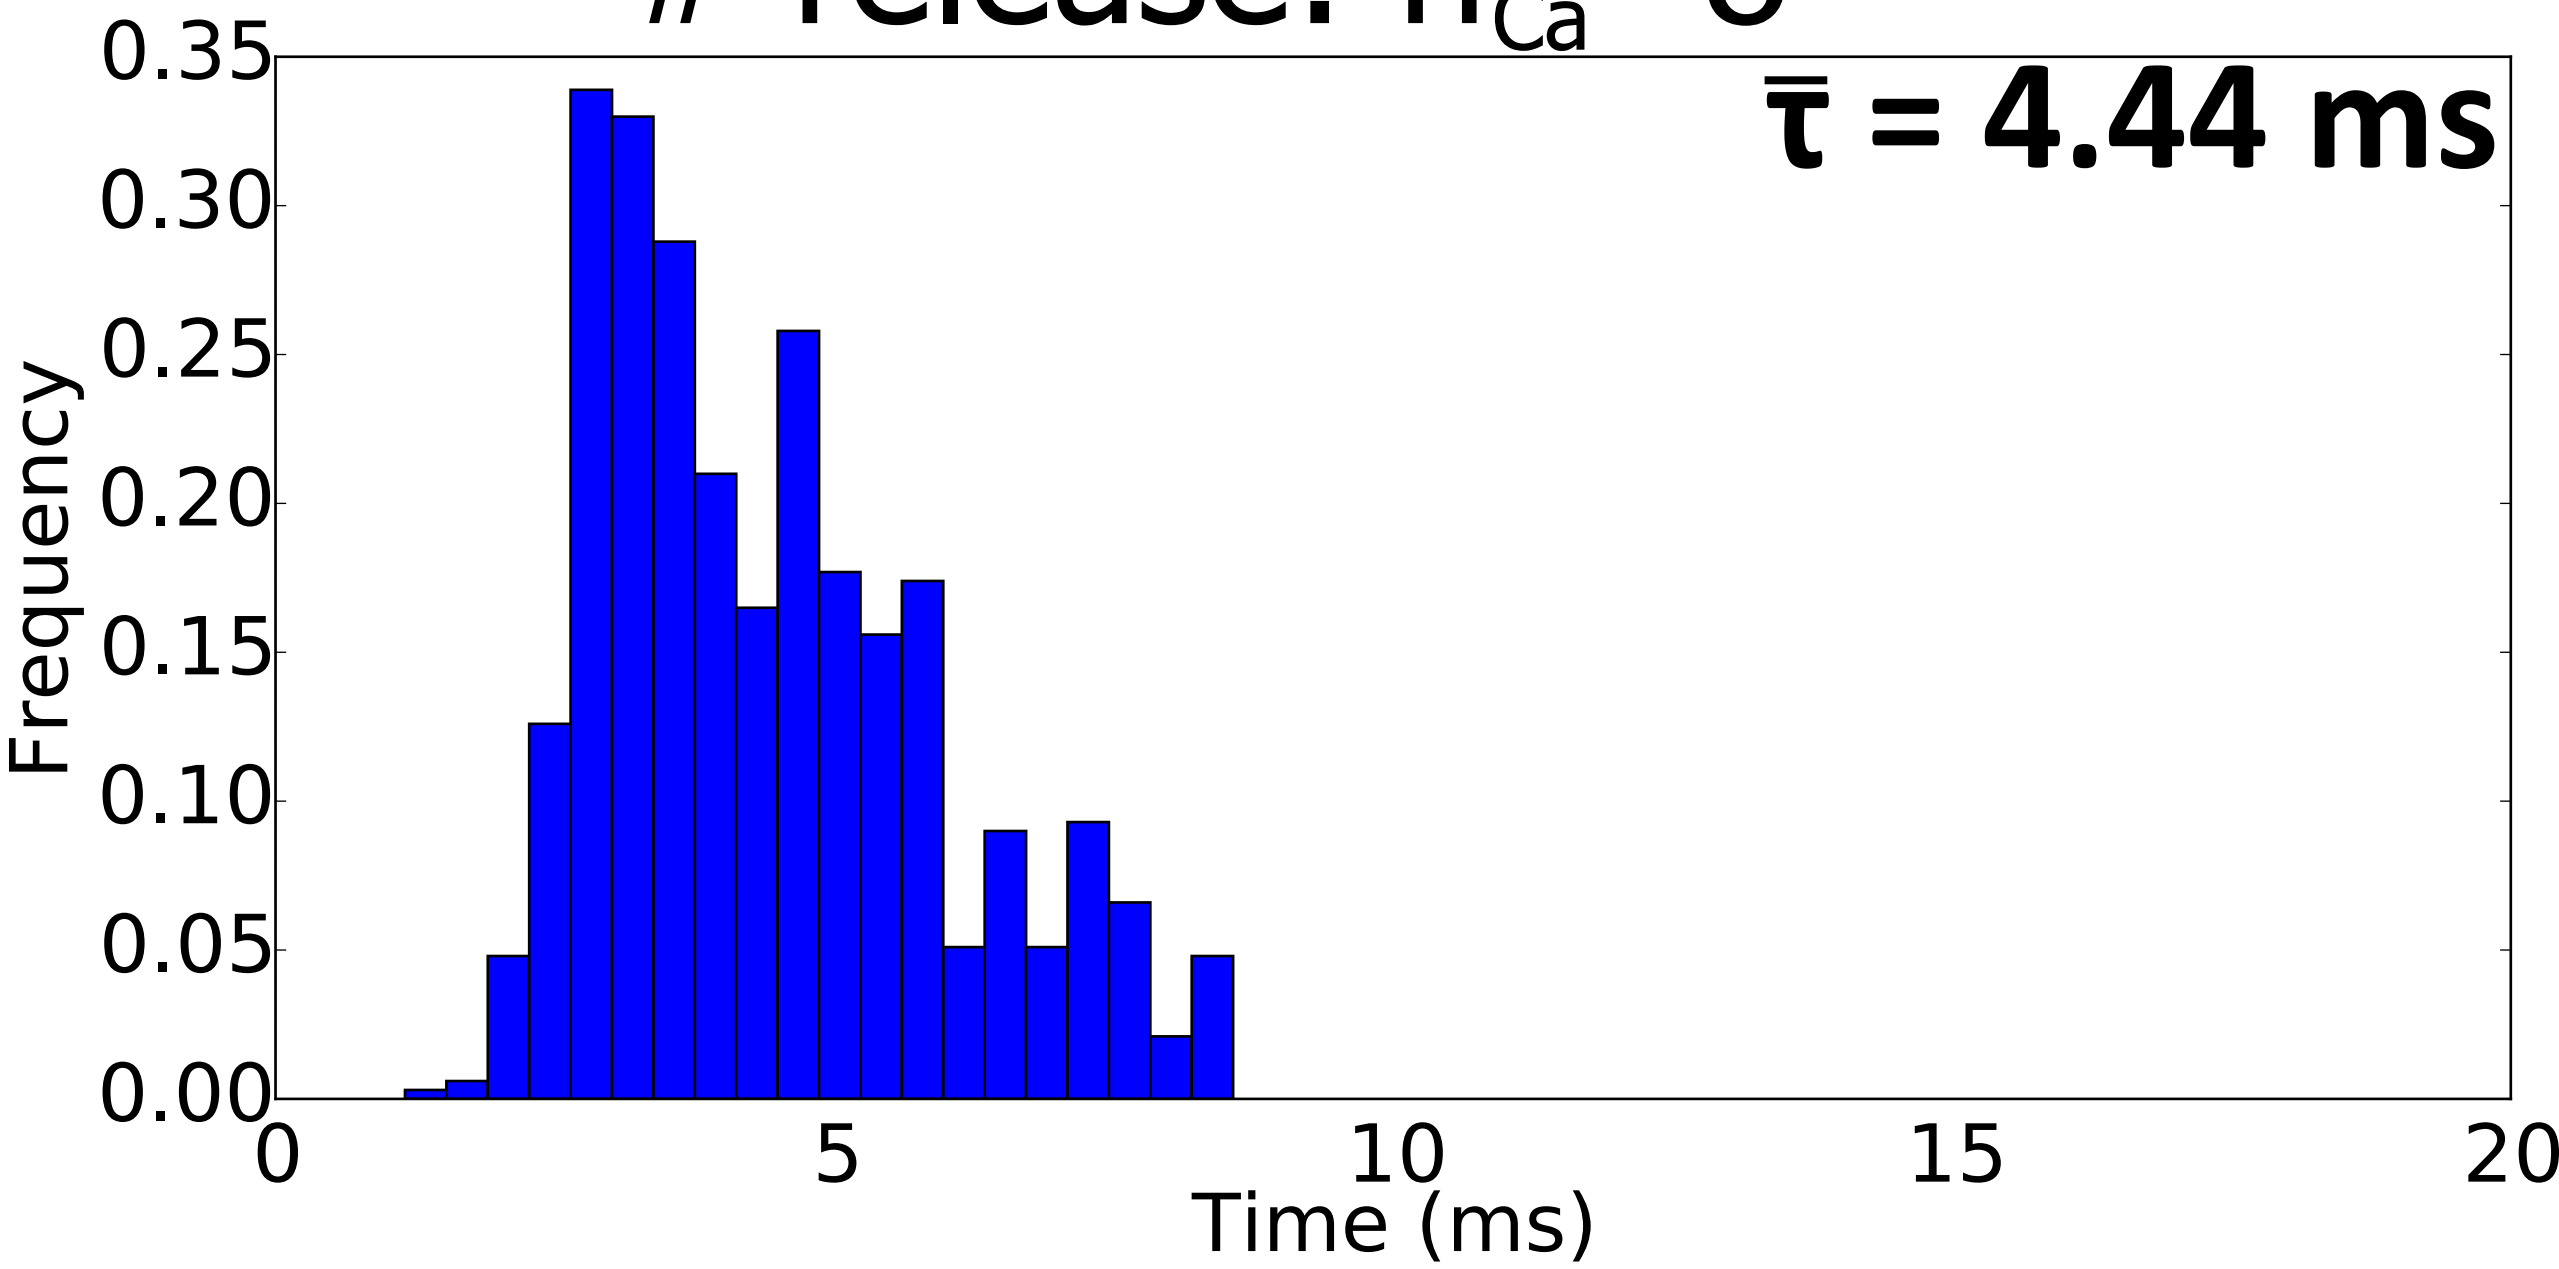

$n_{Ca} = 7$

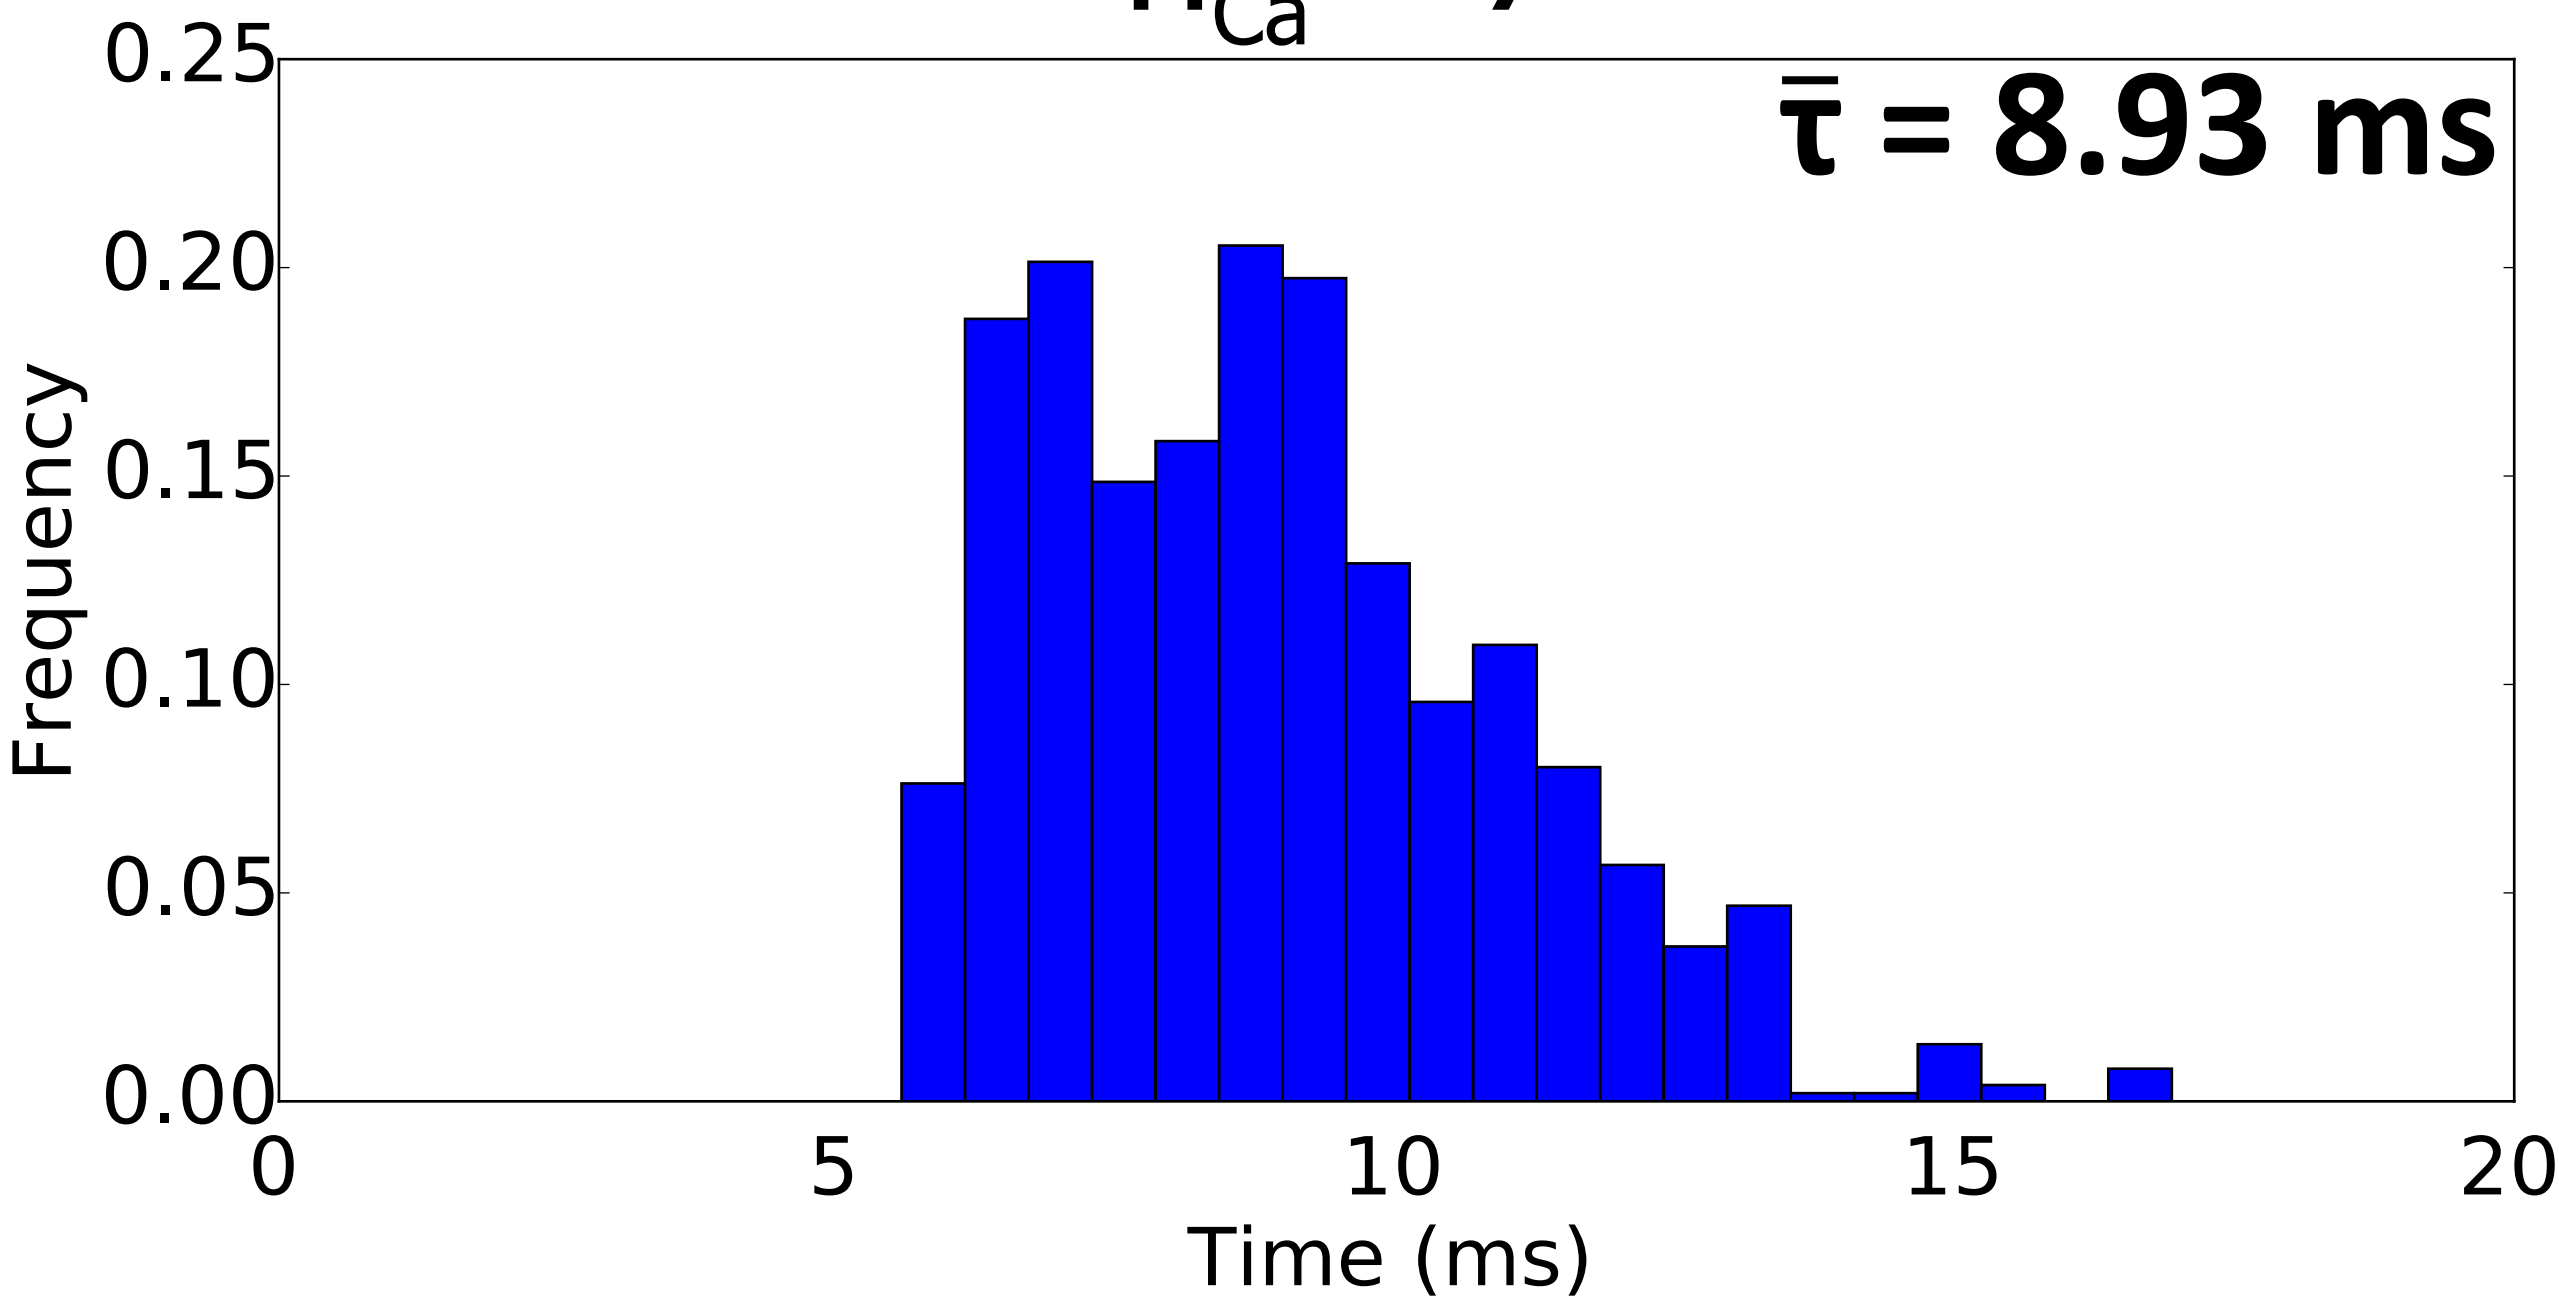

$n_{Ca} = 6$

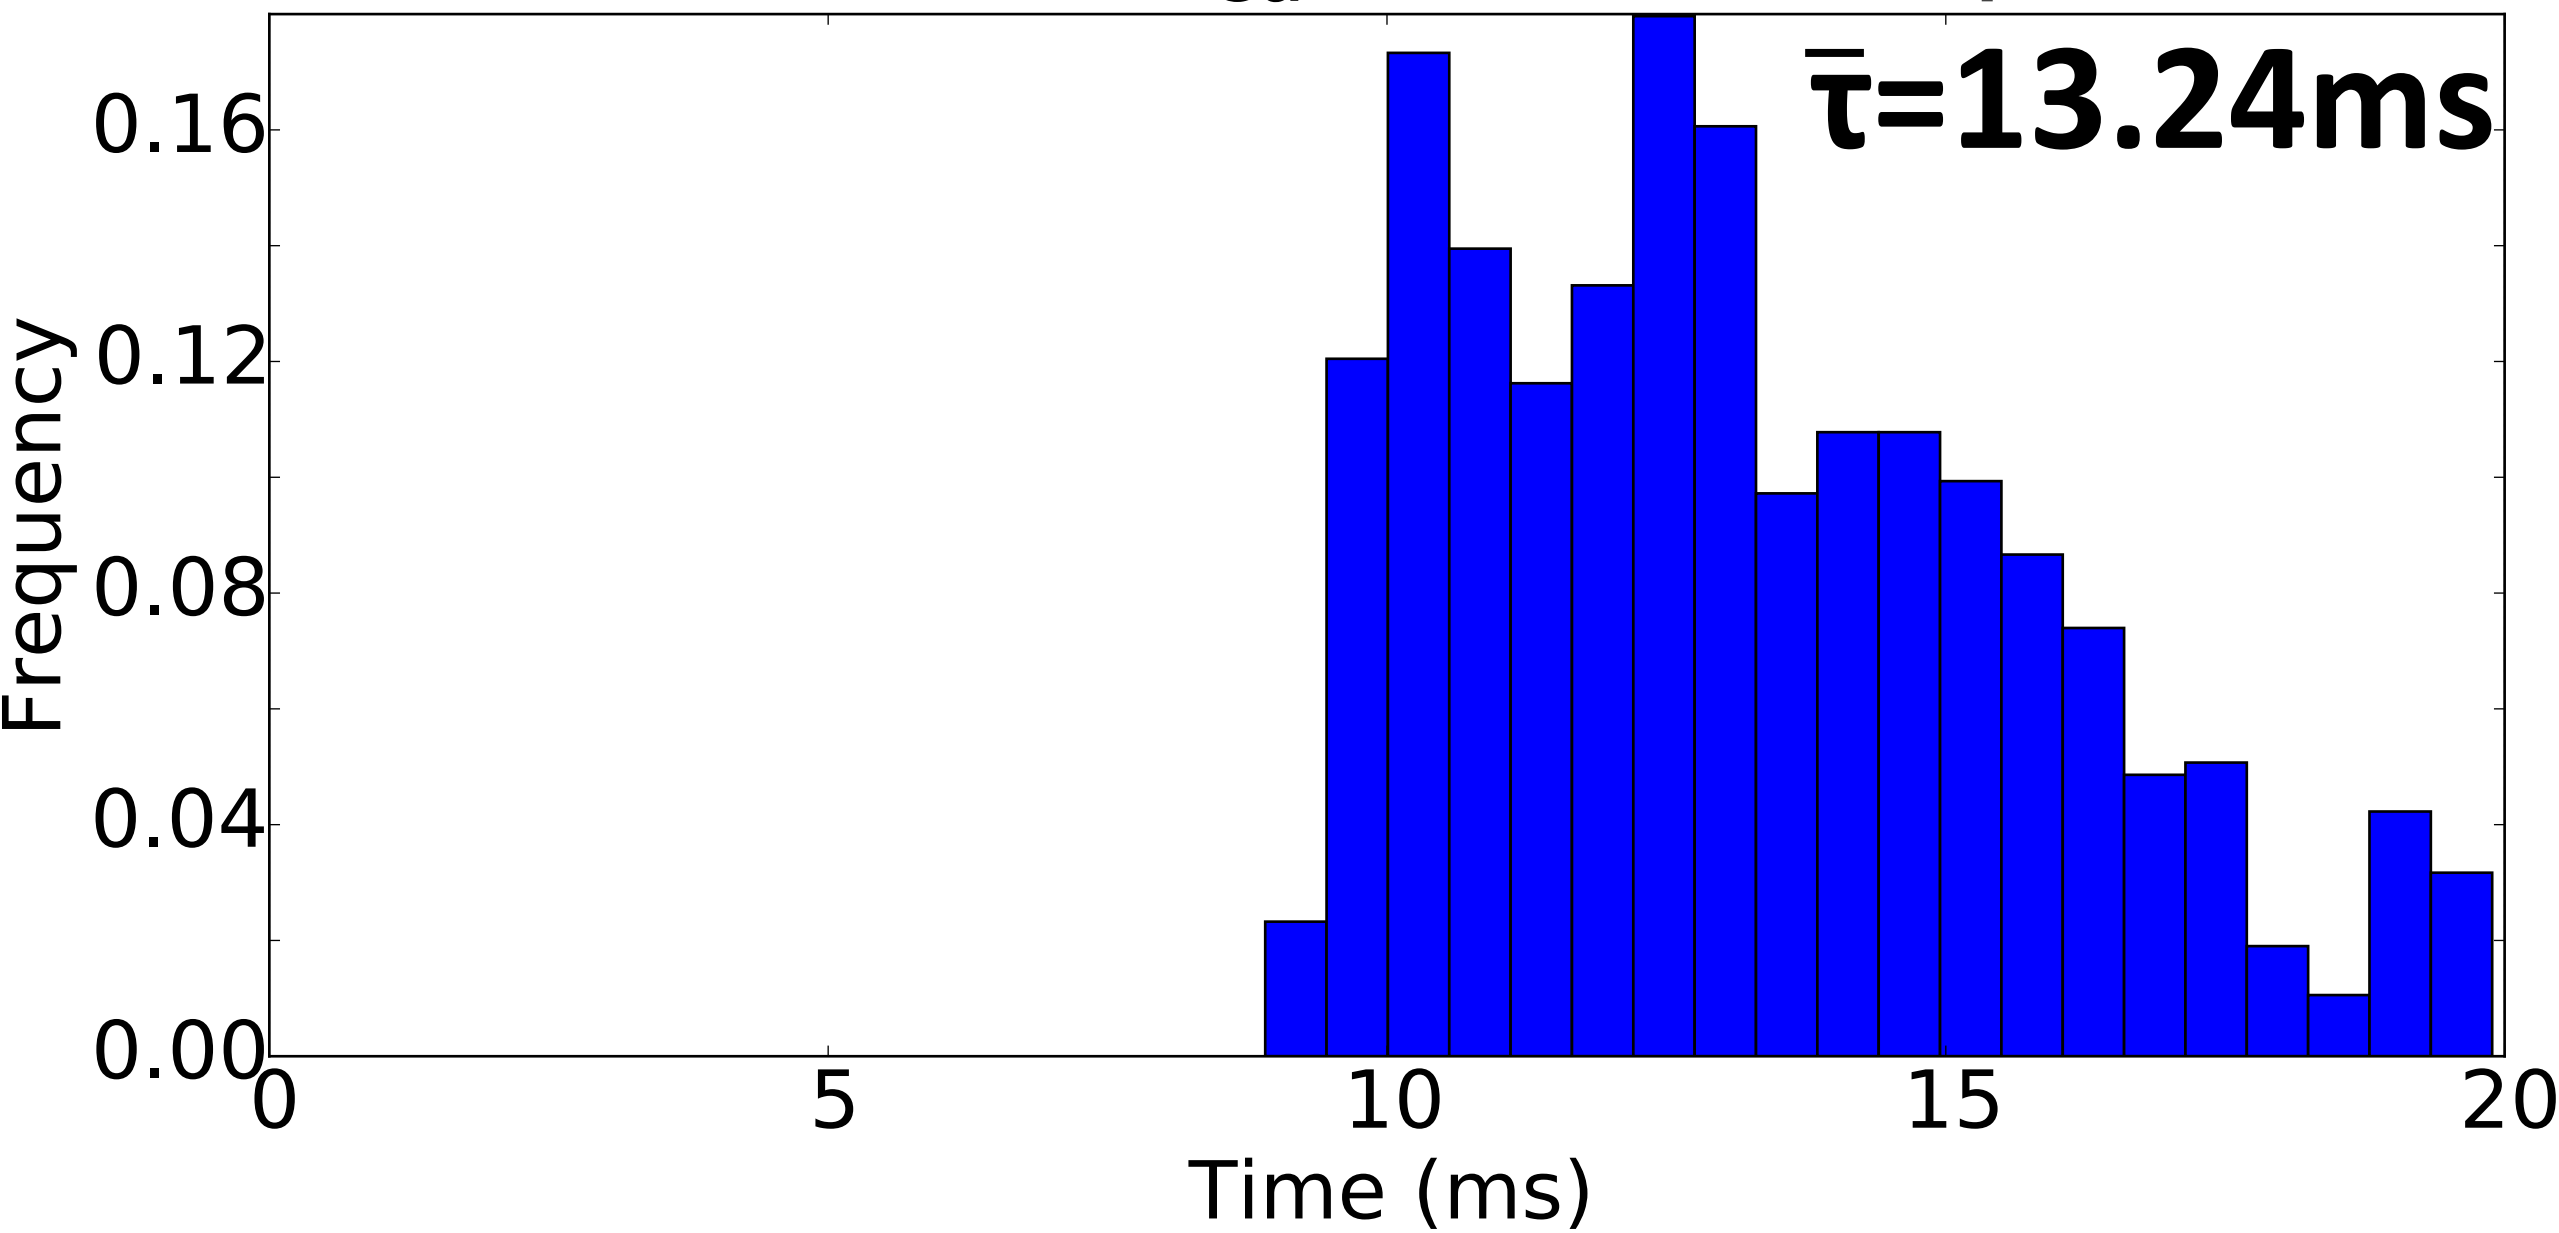

Supplement: pbio.2006202.s008.pdf [file pbio.2006202.s008.pdf]
