# Supplementary material for: Fast calcium transients in dendritic spines driven by extreme statistics
Source: PubMed Central journal article supplement (PMC6548358; doi:10.1371/journal.pbio.2006202), 2019-06-04
Supplement: pbio.2006202.s010.pdf [file pbio.2006202.s010.pdf]

Table S1: Parameters for calcium transient

| Parameters                         | Symbols              | Values                    |
|------------------------------------|----------------------|---------------------------|
| Time step                          | $\Delta t$           | $10^{-7}$ s               |
| Diffusion                          | $D$                  | $600 \mu m^2 s^{-1}$ [37] |
| Initial number of calcium ions     | $N$                  | 1000                      |
| Spine head radius                  | $R$                  | $1 \mu m$                 |
| Spine neck radius                  | $a$                  | $0.15 \mu m$              |
| Spine neck length                  | $L$                  | $1.5 \mu m$               |
| SA head radius                     | $R_{SA}$             | $0.25 \mu m$              |
| SA neck length                     | $L_{SA}$             | $1.5 \mu m$               |
| SA neck radius                     | $a_{SA}$             | $0.05 \mu m$              |
| Spine head-SA head center distance | $l$                  | $0.5 \mu m$               |
| Radius (RyR and SERCA)             | $a_{RyR}, a_{SERCA}$ | $10 nm$                   |
| # SERCA pumps in the SA head       |                      | 36                        |
| # ions absorbed by one SERCA       |                      | 2                         |
| # RyR in the SA base               |                      | 36                        |
| # ions to activate one RyR         |                      | 2                         |
| # calcium released from one RyR    | $n_{Ca}$             | varies (2-8)              |
| # calcium released from one RyR    | $\tau_{SER,TL}$      | $\infty$                  |
