# Supplementary material for: Fast calcium transients in dendritic spines driven by extreme statistics
Source: PubMed Central journal article supplement (PMC6548358; doi:10.1371/journal.pbio.2006202), 2019-06-04
Supplement: pbio.2006202.s011.pdf [file pbio.2006202.s011.pdf]

Table 2: Number of trials for numerical simulation results

| Figure                | Values     |
|-----------------------|------------|
| Fig 1E                | 16         |
| Fig 2B                | 25         |
| Fig 3C                | 25         |
| Fig 3D N=500 & N=1000 | 750 & 1500 |
| Fig 3E                | 10         |
| Fig 3F                | 25         |
| Fig 3G                | 10         |
| Fig 3H                | 15         |
| Fig 4A                | 20         |
| Fig 4B                | 25         |
| S1 Fig 4B             | 25         |
