# Supplementary material for: Fast calcium transients in dendritic spines driven by extreme statistics
Source: PLOS journal article supplement (doi:10.1371/journal.pbio.2006202), 2019-06-04

Closed

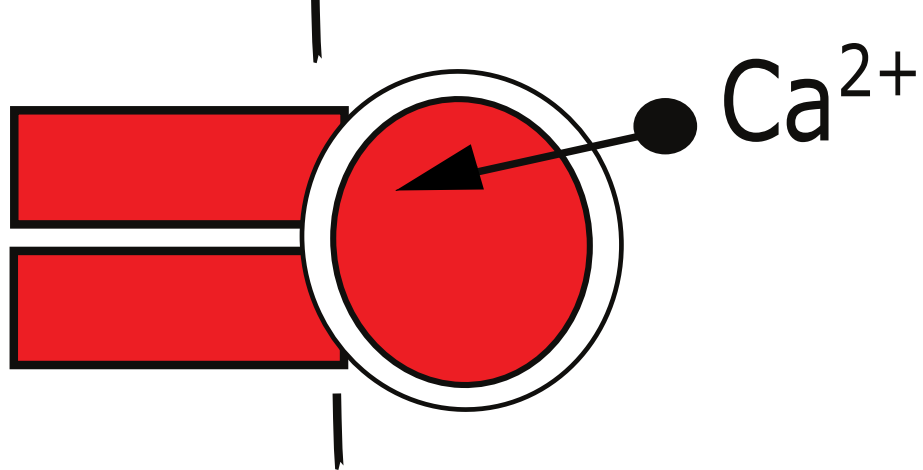

Bound

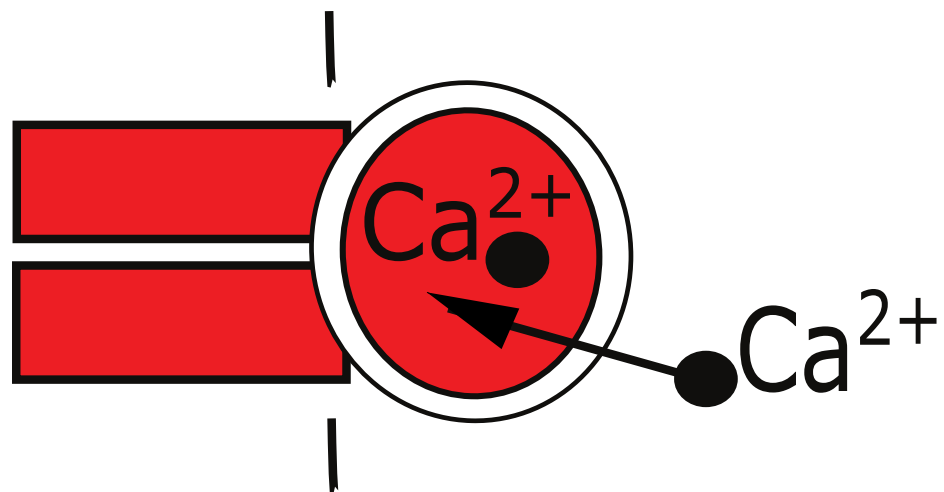

Open

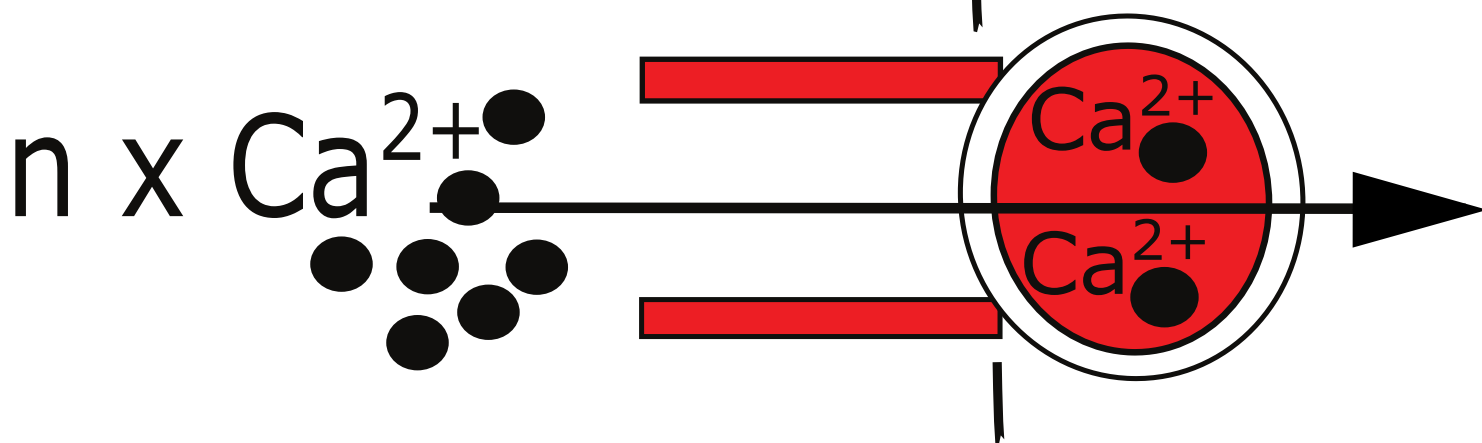

Release

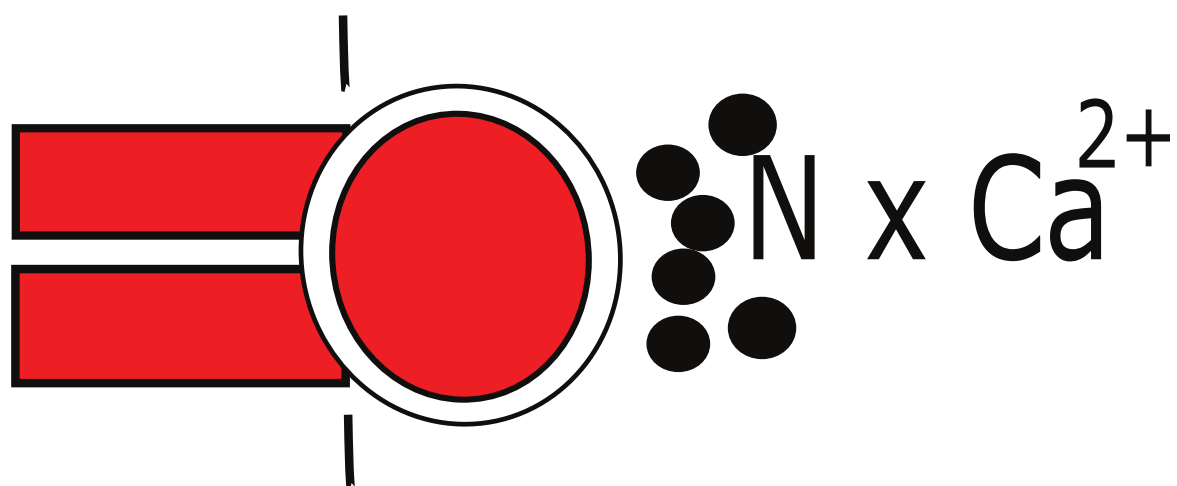

Supplement: S3 (10.1371/journal.pbio.2006202.s003) [file journal.pbio.2006202.s003]
